# Supplementary material for: TIMP3 expression associates with prognosis in colorectal cancer and its novel arylsulfonamide inducer, MPT0B390, inhibits tumor growth, metastasis and angiogenesis
Source: Theranostics. 2019 Sep 18;9(22):6676–89. doi: 10.7150/thno.34020 (PMC6771239; doi:10.7150/thno.34020)
Supplement: Supplementary file 1 — Supplementary figures and tables. [file thnov09p6676s1.pdf]

**TIMP3 expression associates with prognosis in colorectal cancer and its novel arylsulfonamide inducer, MPT0B390, inhibits tumor growth, metastasis and angiogenesis**

Han-Li Huang<sup>1,2</sup>, Yi-Min Liu<sup>1</sup>, Ting-Yi Sung<sup>2</sup>, Tsui-Chin Huang<sup>3</sup>, Ya-Wen Cheng<sup>3</sup>,  
Jing-Ping Liou<sup>1, 4\*</sup>, Shio-Lin Pan<sup>1,2,3,\*</sup>

<sup>1</sup> *TMU Biomedical Commercialization Center, Taipei Medical University, Taipei 11031, Taiwan*

<sup>2</sup> *Ph.D Program in Biotechnology Research and Development, College of Pharmacy, Taipei Medical University, Taipei 11031, Taiwan.*

<sup>3</sup> *Graduate Institute of Cancer Molecular Biology and Drug Discovery, College of Medical Science and Technology, Taipei Medical University, Taipei 11031, Taiwan.*

<sup>4</sup> *School of Pharmacy, College of Pharmacy, Taipei Medical University, Taipei 11031, Taiwan.*

**\*Correspondence:**

**Shio-Lin Pan, Ph.D.**

The Ph.D. Program for Cancer Biology and Drug Discovery,  
College of Medical Science and Technology, Taipei Medical University,  
No. 250 Wuxing Street, Taipei 11031, Taiwan  
E-mail: [slpan@tmu.edu.tw](mailto:slpan@tmu.edu.tw)  
Phone: 886-2-27361661 ext 7671

**Jing-Ping Liou, Ph.D.**

School of Pharmacy, College of Pharmacy, Taipei Medical University, Taipei,  
Taiwan  
No. 250, Wuxing St., Taipei 11031, Taiwan.  
E-mail address: [jpl@tmu.edu.tw](mailto:jpl@tmu.edu.tw)  
Phone: 886-2-27361661 ext 6130

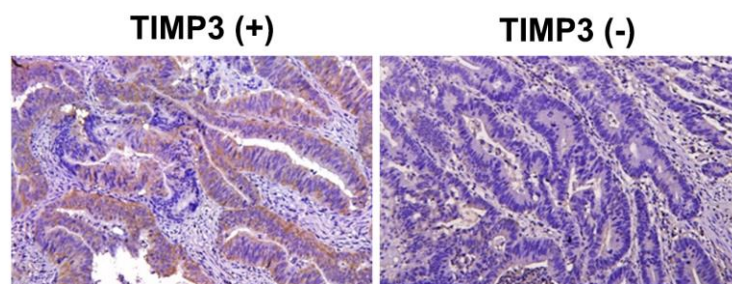

**Supplementary Figure S1.** Representative TIMP3 expression in colon cancer patients (Patients' information and Kaplan-Meier analysis please see Table 2, and Figure 2A and B, respectively).

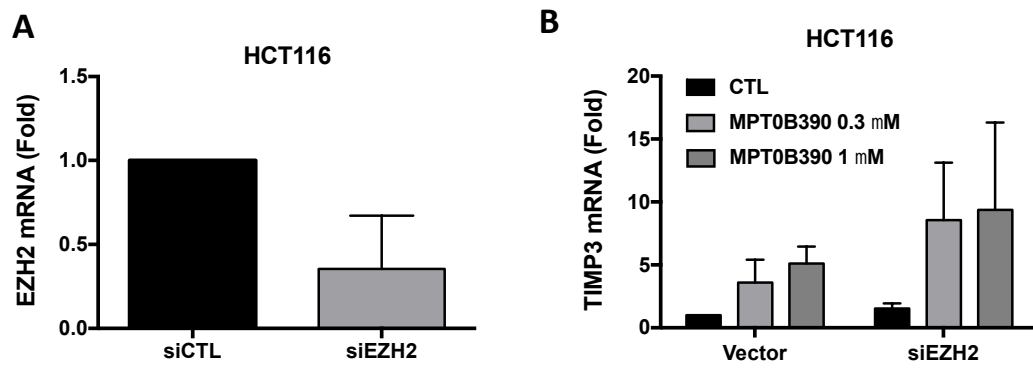

**Supplementary Figure S2. Effect of MPT0B390 on *TIMP3* induction in EZH2 knockdown HCT116 cell.** (A) Knockdown efficiency of siEZH2 in HCT116 cells. HCT116 cells were transfected with siEZH2 for 24 h and then collected for mRNA detection using real-time PCR. (B) MPT0B390 further induced *TIMP3* expression in EZH2 knockdown HCT116 cells. HCT116 cells were transfected with siEZH2 for 24 h and treated with MPT0B390 for an additional 24h. Cells were then collected for mRNA detection using real-time PCR.

**Supplementary Table S1.** Inhibition of HeLa nuclear extract HDAC activity by compounds **7-18**

| Compd                 | Alternative name | HeLa nuclear HDACs |
|-----------------------|------------------|--------------------|
| IC <sub>50</sub> (μM) |                  |                    |
| <b>14</b>             | MPT0B369         | 0.078              |
| <b>7</b>              | MPT0B390         | 0.004              |
| <b>9</b>              | MPT0B515         | 0.050              |
| <b>8</b>              | MPT0B517         | 0.060              |
| <b>10</b>             | MPT0B519         | 0.030              |
| <b>11</b>             | MPT0B522         | 0.008              |
| <b>12</b>             | MPT0B524         | 0.003              |
| <b>13</b>             | MPT0B534         | 0.170              |
| <b>15</b>             | MPT0B553         | 0.032              |
| <b>16</b>             | MPT0B554         | 0.007              |
| <b>17</b>             | MPT0B555         | 0.008              |
| <b>18</b>             | MPT0B556         | 0.1                |

**Supplementary Table S2.** Activities of MPT0B390 and reference Trichostatin A against HDAC isoforms 1, 2, 3, 4, 5, 6, 7, 8, 9 and 11

| Isoenzyme | IC <sub>50</sub> (nM) |                |
|-----------|-----------------------|----------------|
|           | MPT0B390              | Trichostatin A |
| HDAC1     | 17.2                  | 14.5           |
| HDAC2     | 10.1                  | 11.8           |
| HDAC3     | 4.16                  | 17.9           |
| HDAC4     | -                     | 5870.0         |
| HDAC5     | -                     | 1440.0         |
| HDAC6     | 20.9                  | 3.96           |
| HDAC7     | -                     | 1490.0         |
| HDAC8     | 72.2                  | 148.0          |
| HDAC9     | -                     | 8860.0         |
| HDAC11    | 19.9                  | 30.7           |

**Supplementary Table S3. Primer sequences for qRT-PCR and chromatin immunoprecipitation assays.**

| <b>A. qRT-PCR</b>                        |                                                                                        |
|------------------------------------------|----------------------------------------------------------------------------------------|
| TIMP3                                    | 5'-TGCTCTCTGTCTCTTTTTTCAGCTT-3' (Foward)<br>5'-CTACAGTGTGTTGTCTGCTGCTTTT-3' (Reverse)  |
| uPA                                      | 5'-CCACAACGACATTGCCTTGCTGAA-3' (Foward)<br>5'-ATCGTTATACATCGAGGGCAGGCA-3' (Reverse)    |
| uPAR                                     | 5'-AAGATCACCAGCCTTACCGAGGTT-3' (Foward)<br>5'-ATTGAGGTAACGGCTTCGGGAAT-3' (Reverse)     |
| c-Met                                    | 5'-ATCAACATGGCTCTAGTTGTC-3' (Foward)<br>5'-GGGAGAATATGCAGTGAACC-3' (Reverse)           |
| E-cadherin                               | 5'-ATTCTGATTCTGCTGCTCTTG-3' (Foward)<br>5'-AGTCCTGGTCCTCTTCTCC-3' (Reverse)            |
| GAPDH                                    | 5'-TGGGATTTCCATTGATGACAAG-3' (Foward)<br>5'-ATTCCACCCATGGCAAATTC-3' (Reverse)          |
| 18S rRNA                                 | 5'-AACCCGTTGAACCCCAT-3' (Foward)<br>5'-CCATCCAATCGGTAGTAGC-3' (Reverse)                |
| <b>B. qRT-PCR primers for ChIP assay</b> |                                                                                        |
| TIMP3<br>Set a                           | 5'-GTTAGAGTGAAGGCAGGGAAG-3' (Foward)<br>5'-TTTGAGCACTTTAGCCATAGGA-3' (Reverse)         |
| TIMP3<br>Set b                           | 5'-TGGAAGATCCCAGCTGCAAAT-3' (Foward)<br>5'-GAGACATGCATTTCCCTGAACG-3' (Reverse)         |
| TIMP3<br>Set c                           | 5'-GTGAGAGCTATAATACGGTGAGATAC-3' (Foward)<br>5'-CAGGATCCTAGACGACTAGCTATAA-3' (Reverse) |
| TIMP3<br>Set d                           | 5'-CAGCAGATGGCTTCCCATATC-3' (Foward)<br>5'-CACAGAGGAGAAAGACCCAAAC-3' (Reverse)         |

## Supporting information

**N-(5-Bromopyridin-2-yl)-4-methoxybenzenesulfonamide (20).** A mixture of 2-amino-5-bromopyridine (**19**, 1.05 g, 6.07 mmol), DMAP (0.07 g, 0.55 mmol), ACN (14 mL) and pyridine (3.6 mL) was added 4-methoxybenzenesulfonyl chloride (1.27 g, 6.13 mmol) under nitrogen and stirred at rt. Overnight. The reaction was quenched with water and extracted with ethyl acetate (30 mL x 3). The organic layer was collected and dried over anhydrous  $\text{MgSO}_4$  and concentrated *in vacuo* to yield a dark brown product. The residue was purified by flash column over silica gel (ethyl acetate: n-hexane = 1:1) to afford **20** (1.08 g, 51.84%) as a yellow solid.  $^1\text{H-NMR}$  (300MHz,  $\text{CDCl}_3$ ):  $\delta$  3.86 (s, 3H), 6.93(d,  $J = 9.0$  Hz, 2H), 7.48 (d,  $J = 9.0$  Hz, 1H), 7.73-7.81 (m, 3H), 8.40 (s, 1H).

**(E)-3-(6-(4-Methoxyphenylsulfonamido)7xpressi-3-yl)acrylic acid (21).** A mixture of **20** (0.14 g, 0.41 mmol), palladium acetate (0.01 g, 0.04 mmol), triphenylphosphine (0.02 g, 0.08 mmol), triethylamine (0.06 mL, 0.41 mmol), sodium bicarbonate (0.07 g, 0.82 mmol) and DMF (1.5 mL) was stirred for a while then added the *t*-butyl acrylate (0.07 mL, 0.49 mmol) at 120 °C and stirred overnight. The residue was purified by flash column over silica gel (ethyl acetate: n-hexane = 1:2) to give the *t*-butyl acrylate compound as a yellow solid. To the ester compound was added trifluoroacetic acid (1.5 mL) and stirred at room temperature for 1 hour. The reaction

was quenched with water and filtered by gravity filtration to yield **21** as a white solid without further purification (0.21g, 61.55%).  $^1\text{H-NMR}$  (300 MHz,  $\text{CD}_3\text{OD} + \text{DMSO-}d_6$ ):  $\delta$  3.90 (s, 3H), 6.51 (d,  $J = 15.9$  Hz, 1H), 7.12 (d,  $J = 8.7$  Hz, 2H), 7.26 (d,  $J = 9.0$  Hz, 1H), 7.60 (d,  $J = 15.9$  Hz, 1H), 7.96 (d,  $J = 8.7$  Hz, 2H), 8.06 (d,  $J = 9.0$  Hz, 1H), 8.35 (s, 1H).

**(*E*)-N-Hydroxy-3-(6-(4-methoxyphenylsulfonamido)pyridin-3-yl)acrylamide (**6**).**

A mixture of **21** (0.30 g, 0.90 mmol), EDC•HCl (0.26 g, 1.35 mmol), HOBt (0.15 g, 1.08 mmol), NMM (0.24 mL, 2.16 mmol) and DMF (2 mL) was stirred for a while then added the  $\text{NH}_2\text{OTHP}$  (0.13 g, 1.08 mmol) at room temperature and was stirred overnight. The residue was purified by flash column over silica gel (ethyl acetate: n-hexane = 4:1) to afford the oily product. The resulting oily product was dissolved in MeOH (5 mL) and added the 10%  $\text{TFA}_{(\text{aq.})}$  (5 mL) at room temperature and stirred for overnight. The reaction was added  $\text{H}_2\text{O}$  to produce the precipitant. The residue was without more purification to afford **6** (0.17g, 54.16%) as a white solid with m.p. 180.0-181.0 °C.  $^1\text{H-NMR}$  (300MHz,  $\text{DMSO-}d_6$ ):  $\delta$  3.79 (s, 3H), 6.33 (d,  $J = 15.9$  Hz, 1H), 7.06 (d,  $J = 9.0$  Hz, 2H), 7.12 (d,  $J = 9.0$  Hz, 1H), 7.35 (d,  $J = 15.9$  Hz, 1H), 7.82 (t,  $J = 9.0$  Hz, 2H), 7.89 (d,  $J = 9.0$  Hz, 1H), 8.25 (s, 1H), 9.01 (s, 1H), 10.72 (s, 1H).  $^{13}\text{C-NMR}$  (125MHz,  $\text{DMSO-}d_6$ ):  $\delta$  55.61, 112.78, 114.17, 118.76, 128.98, 132.69,

134.22, 136.69, 152.70, 162.30, 162.52. HRMS (ESI) for  $C_{15}H_{15}N_3O_5S$  ( $[M+H]^+$ ): calcd, 349.0730; found, 350.0803.

**5-bromo-2,3-dihydro-1H-pyrrolo[2,3-b]pyridine (23).** To a mixture of 7-azaindoline (**22**, 4.0 g, 33.29 mmol), pyridine (4 mL) and  $CH_2Cl_2$  (40 mL) was slowly added  $Br_2$  (1.72 mL, 33.29 mmol) in  $CH_2Cl_2$  (24 mL) under ice bath and was allowed to stir for 2 h under nitrogen. The reaction was quenched with water and extracted with ethyl acetate (30 mL x 3). The organic layer was collected and dried over anhydrous  $MgSO_4$  and concentrated *in vacuo* to yield a dark brown product. The residue was purified by flash column over silica gel (ethyl acetate: n-hexane = 2:1) to afford **23** (4.88 g, 73.65%) as a yellow solid.  $^1H$ -NMR (500 MHz,  $CDCl_3$ ):  $\delta$  3.06 (t,  $J$  = 8.5 Hz, 2H), 3.64 (t,  $J$  = 8.5 Hz, 2H), 7.31 (s, 1H), 7.85 (s, 1H).

**5-Bromo-1-(4-methoxyphenylsulfonyl)-2,3-dihydro-1H-pyrrolo[2,3-b]pyridine (24a).** A mixture of **23** (0.35 g, 1.76 mmol), 4-methoxybenzenesulfonyl chloride (0.55 g, 2.64 mmol) and pyridine (3 mL) was refluxed overnight. The reaction was quenched with water and extracted with ethyl acetate (30 mL x 3). The organic layer was collected and dried over anhydrous  $MgSO_4$  and concentrated *in vacuo* to yield a brown product. The residue was purified by flash column over silica gel (ethyl acetate: n-hexane = 1:1) to afford **24a** (0.34 g, 52.31%) as a yellow solid.  $^1H$ -NMR

(500 MHz, CDCl<sub>3</sub>):  $\delta$  3.02 (t,  $J$  = 8.5 Hz, 2H), 3.84 (s, 3H), 4.05 (t,  $J$  = 8.5 Hz, 2H), 6.94 (d,  $J$  = 9.5 Hz, 2H), 7.45 (s, 1H), 8.01 (d,  $J$  = 8.0 Hz, 2H), 8.18 (s, 1H).

**5-Bromo-1-(phenylsulfonyl)-2,3-dihydro-1H-pyrrolo[2,3-b]pyridine (24b).** The title compound was obtained in 78.73% overall yield from compound **23** and benzenesulfonyl chloride in a similar manner as described for the preparation of **24b**.

<sup>1</sup>H-NMR (500 MHz, CDCl<sub>3</sub>):  $\delta$  3.04 (t,  $J$  = 8.5 Hz, 2H), 4.08 (t,  $J$  = 8.5 Hz, 2H), 7.46 (s, 1H), 7.49 (t,  $J$  = 8.0 Hz, 2H), 7.58 (t,  $J$  = 7.5 Hz, 1H), 8.08 (t,  $J$  = 8.0 Hz, 2H), 8.18 (s, 1H).

**5-Bromo-1-(3-methoxyphenylsulfonyl)-2,3-dihydro-1H-pyrrolo[2,3-b]pyridine**

**(24c).** The title compound was obtained in 86.17% overall yield from compound **23** and 3-methoxybenzenesulfonyl chloride in a similar manner as described for the preparation of **24c**. <sup>1</sup>H-NMR (500 MHz, CDCl<sub>3</sub>):  $\delta$  3.04 (t,  $J$  = 8.5 Hz, 2H), 3.84 (s, 3H), 4.07 (t,  $J$  = 8.5 Hz, 2H), 7.11 (dd,  $J$  = 2.5, 9.0 Hz, 1H), 7.38 (t,  $J$  = 8.0 Hz, 1H), 7.46 (s, 1H), 7.62 (dd,  $J$  = 1.5, 8.0 Hz, 1H), 7.65 (s, 1H), 8.19 (s, 1H).

**5-Bromo-1-(3-nitrophenylsulfonyl)-2,3-dihydro-1H-pyrrolo[2,3-b]pyridine (24d).**

The title compound was obtained in 53.24% overall yield from compound **23** and 3-nitrobenzenesulfonyl chloride in a similar manner as described for the preparation of **24d**. <sup>1</sup>H-NMR (500 MHz, CDCl<sub>3</sub>):  $\delta$  3.11 (t,  $J$  = 8.5 Hz, 2H), 4.16 (t,  $J$  = 8.5 Hz,

2H), 7.51 (s, 1H), 7.72 (t,  $J = 9.0$  Hz, 1H), 8.18 (s, 1H), 8.42-8.44 (m, 1H), 8.46-8.49 (m, 1H), 8.96 (t,  $J = 9.0$  Hz, 1H).

**5-Bromo-1-(4-bromophenylsulfonyl)-2,3-dihydro-1H-pyrrolo[2,3-b]pyridine**

**(24e).** The title compound was obtained in 77.46% overall yield from compound **23** and 4-bromobenzenesulfonyl chloride in a similar manner as described for the preparation of **24e**.  $^1\text{H-NMR}$  (500 MHz,  $\text{CDCl}_3$ ):  $\delta$  3.05 (t,  $J = 8.5$  Hz, 2H), 4.06 (t,  $J = 8.5$  Hz, 2H), 7.47 (s, 1H), 7.62 (d,  $J = 8.5$  Hz, 2H), 7.95 (d,  $J = 8.5$  Hz, 2H), 8.16 (s, 1H).

**5-Bromo-1-(3-bromophenylsulfonyl)-2,3-dihydro-1H-pyrrolo[2,3-b]pyridine**

**(24f).** The title compound was obtained in 76.10% overall yield from compound **23** and 3-bromobenzenesulfonyl chloride in a similar manner as described for the preparation of **24f**.  $^1\text{H-NMR}$  (500 MHz,  $\text{CDCl}_3$ ):  $\delta$  3.07 (t,  $J = 8.5$  Hz, 2H), 4.09 (t,  $J = 8.5$  Hz, 2H), 7.37 (t,  $J = 8.0$  Hz, 1H), 7.48-7.49 (m, 1H), 7.69-7.71 (m, 1H), 8.03-8.05 (m, 1H), 8.19 (d,  $J = 9.0$  Hz, 1H), 8.25 (d,  $J = 8.0$  Hz, 1H).

**5-Bromo-1-(2-bromophenylsulfonyl)-2,3-dihydro-1H-pyrrolo[2,3-b]pyridine**

**(24g).** The title compound was obtained in 40.77% overall yield from compound **23** and 2-bromobenzenesulfonyl chloride in a similar manner as described for the preparation of **24g**.  $^1\text{H-NMR}$  (500 MHz,  $\text{CDCl}_3$ ):  $\delta$  3.18 (t,  $J = 8.5$  Hz, 2H), 4.49 (t,  $J$

= 8.5 Hz, 2H), 7.38-7.42 (m, 1H), 7.48-7.52 (m, 2H), 7.67 (t,  $J$  = 8.0 Hz, 1H), 7.92 (s, 1H), 8.43 (d,  $J$  = 8.0 Hz, 1H).

**(*E*)-3-(1-(4-Methoxyphenylsulfonyl)-2,3-dihydro-1H-pyrrolo[2,3-*b*]pyridin-5-yl)**

**acrylic acid (24a).** The title compound was obtained in 43.43% overall yield from compound **25a** in a similar manner as described for the preparation of **21**.  $^1\text{H-NMR}$  (500 MHz,  $\text{CD}_3\text{OD}$ ):  $\delta$  3.09 (t,  $J$  = 8.5 Hz, 2H), 3.83 (s, 3H), 4.07 (t,  $J$  = 8.5 Hz, 2H), 6.42 (d,  $J$  = 16.0 Hz, 1H), 7.05 (d,  $J$  = 9.0 Hz, 2H), 7.58 (d,  $J$  = 16.0 Hz, 1H), 7.86 (s, 1H), 7.97 (d,  $J$  = 9.0 Hz, 2H), 8.16 (s, 1H).

**(*E*)-3-(1-(Phenylsulfonyl)-2,3-dihydro-1H-pyrrolo[2,3-*b*]pyridin-5-yl)acrylic acid**

**(25b).** A mixture of **24b** (0.47 g, 1.39 mmol), palladium acetate (0.03 g, 0.14 mmol), triphenylphosphine (0.07 g, 0.28 mmol), triethylamine (0.19 mL, 1.39 mmol), sodium bicarbonate (0.23 g, 2.78 mmol) and DMF (3 mL) was stirred for a while then added the methyl acrylate (0.15 mL, 1.67 mmol) at 120 °C and stirred for overnight. The residue was purified by flash column over silica gel (ethyl acetate: n-hexane = 1:1) to give the methyl acrylate compound as a yellow solid. A mixture of ester compound and dioxane (5 mL) was added 1M  $\text{LiOH}_{(\text{aq.})}$  (2.22 mL, 2.22 mmol) and stirred overnight at 40 °C. The reaction was removed out solvent and dissolved in water. The water layer was added the 3N  $\text{HCl}_{(\text{aq.})}$  and filtered by gravity filtration to yield a white product **25b** (0.36 g, 98.17%).  $^1\text{H-NMR}$  (500 MHz,  $\text{DMSO-d}_6$ ):  $\delta$  3.08 (t,  $J$  = 8.5 Hz,

2H), 4.08 (t,  $J = 8.5$  Hz, 2H), 6.44 (d,  $J = 16.0$  Hz, 1H), 7.50 (d,  $J = 16.0$  Hz, 1H), 7.58 (t,  $J = 7.5$  Hz, 2H), 7.68 (t,  $J = 7.5$  Hz, 1H), 7.94 (s, 1H), 8.01 (d,  $J = 8.5$  Hz, 2H), 8.26 (s, 1H).

**(*E*)-3-(1-(3-Methoxyphenylsulfonyl)-2,3-dihydro-1H-pyrrolo[2,3-*b*]pyridin-5-yl)**

**acrylic acid (25c).** The title compound was obtained in 93.32% overall yield from compound **24c** in a similar manner as described for the preparation of **21**.  $^1\text{H-NMR}$  (500 MHz,  $\text{CD}_3\text{OD}$ ):  $\delta$  3.09 (t,  $J = 8.5$  Hz, 2H), 3.82 (s, 3H), 4.08 (t,  $J = 8.5$  Hz, 2H), 6.42 (d,  $J = 16.0$  Hz, 1H), 7.18 (dd,  $J = 2.0, 8.5$  Hz, 1H), 7.44 (t,  $J = 8.5$  Hz, 2H), 7.57-7.61 (m, 3H), 7.83 (s, 1H), 8.19 (s, 1H).

**(*E*)-3-(1-(3-Nitrophenylsulfonyl)-2,3-dihydro-1H-pyrrolo[2,3-*b*]pyridin-5-yl)-acr**

**ylic acid (25d).** The title compound was obtained in 45.05% overall yield from compound **24d** in a similar manner as described for the preparation of **21**.  $^1\text{H-NMR}$  (500 MHz,  $\text{DMSO}-d_6$ ):  $\delta$  3.10 (t,  $J = 8.5$  Hz, 2H), 4.15 (t,  $J = 8.5$  Hz, 2H), 6.46 (d,  $J = 16.0$  Hz, 1H), 7.51 (d,  $J = 16.0$  Hz, 1H), 7.90 (t,  $J = 8.0$  Hz, 1H), 7.97 (s, 1H), 8.29 (s, 1H), 8.44 (d,  $J = 8.0$  Hz, 1H), 8.50 (d,  $J = 8.0$  Hz, 1H), 8.74 (s, 1H).

**(*E*)-4-(4-(5-((*E*)-2-Carboxyvinyl)-2,3-dihydro-1H-pyrrolo[2,3-*b*]13xpressi-1-ylsulf**

**onyl)-phenyl)but-2-enoic acid (25e).** The title compound was obtained in 42.33% overall yield from compound **24e** in a similar manner as described for the preparation of **21**.  $^1\text{H-NMR}$  (500 MHz,  $\text{DMSO}-d_6$ ):  $\delta$  3.09 (t,  $J = 8.5$  Hz, 2H), 4.10 (t,  $J = 8.5$  Hz,

2H), 6.45 (d,  $J = 16.0$  Hz, 1H), 6.65 (d,  $J = 16.0$  Hz, 1H), 7.50 (d,  $J = 16.0$  Hz, 1H), 7.59 (d,  $J = 16.5$  Hz, 1H), 7.88 (d,  $J = 8.5$  Hz, 2H), 7.95 (s, 1H), 8.01 (d,  $J = 8.0$  Hz, 2H), 8.27 (s, 1H).

**(*E*)-3-(3-(5-((*E*)-2-Carboxyvinyl)-2,3-dihydro-1H-pyrrolo[2,3-*b*]14xpressi-1-ylsulfonyl)-phenyl)but-2-enoic acid (25f).** The title compound was obtained in 35.35% overall yield from compound **24f** in a similar manner as described for the preparation of **21**.  $^1\text{H-NMR}$  (500 MHz, DMSO- $d_6$ ):  $\delta$  3.09 (t,  $J = 8.5$  Hz, 2H), 4.15 (t,  $J = 8.5$  Hz, 2H), 6.44 (d,  $J = 16.0$  Hz, 1H), 6.62 (d,  $J = 16.0$  Hz, 1H), 7.49 (d,  $J = 16.0$  Hz, 1H), 7.61-7.66 (m, 2H), 7.95 (s, 1H), 8.02 (t,  $J = 9.0$  Hz, 2H), 8.21 (s, 1H), 8.26 (s, 1H).

**(*E*)-3-(2-(5-((*E*)-2-Carboxyvinyl)-2,3-dihydro-1H-pyrrolo[2,3-*b*]14xpressi-1-ylsulfonyl)phenyl)acrylic acid (25g).** The title compound was obtained in 33.42% overall yield from compound **24g** in a similar manner as described for the preparation of **25b**.  $^1\text{H-NMR}$  (500 MHz, DMSO- $d_6$ ):  $\delta$  3.11 (t,  $J = 8.5$  Hz, 2H), 4.32 (t,  $J = 8.5$  Hz, 2H), 6.39-6.43 (m, 2H), 7.45 (d,  $J = 16.0$  Hz, 1H), 7.64 (t,  $J = 8.0$  Hz, 1H), 7.70 (t,  $J = 8.0$  Hz, 1H), 7.86 (d,  $J = 7.5$  Hz, 1H), 7.95 (s, 1H), 8.07 (s, 1H), 8.14 (d,  $J = 8.0$  Hz, 1H), 8.33 (d,  $J = 16.0$  Hz, 1H).

**(*E*)-*N*-Hydroxy-3-(1-(4-methoxyphenylsulfonyl)-2,3-dihydro-1H-pyrrolo[2,3-*b*]pyridin-5-yl)acrylamide (7).** The title compound was obtained in 88.79% overall yield from compound **25a** in a similar manner as described for the preparation of **6** with

m.p. 201.6-202.6 °C.  $^1\text{H}$ -NMR (500 MHz, DMSO- $d_6$ ):  $\delta$  3.06 (t,  $J$  = 8.5 Hz, 2H), 3.80 (s, 3H), 4.01 (t,  $J$  = 8.5 Hz, 2H), 6.34 (d,  $J$  = 16.0 Hz, 1H), 7.08 (d,  $J$  = 9.0 Hz, 2H), 7.38 (d,  $J$  = 16.0 Hz, 1H), 7.72 (s, 1H), 7.93 (t,  $J$  = 9.0 Hz, 2H), 8.19 (s, 1H), 8.99 (br, 1H), 10.70 (s, 1H).  $^{13}\text{C}$ -NMR (125MHz, DMSO- $d_6$ ):  $\delta$  24.44, 48.72, 55.68, 114.28, 118.48, 125.49, 125.54, 128.89, 129.97, 130.59, 134.88, 147.10, 156.32, 162.58, 163.21. MS (ESI)  $m/z$ : 376.0 ( $[\text{M}+\text{H}]^+$ ). HRMS (ESI) for  $\text{C}_{17}\text{H}_{17}\text{N}_3\text{O}_5\text{S}$  ( $[\text{M}-\text{H}]^-$ ): calcd, 374.0816; found, 374.0823.

**(*E*)-*N*-hydroxy-3-(1-(phenylsulfonyl)-2,3-dihydro-1H-pyrrolo[2,3-*b*]pyridin-5-yl)**

**acrylamide (8).** The title compound was obtained in 89.09% overall yield from

compound **25b** in a similar manner as described for the preparation of **6** with m.p.

198.1-199.0 °C.  $^1\text{H}$ -NMR (500MHz, DMSO- $d_6$ ):  $\delta$  3.08 (t,  $J$  = 8.5 Hz, 2H), 4.06 (t,  $J$  = 8.5 Hz, 2H), 6.35 (d,  $J$  = 16.0 Hz, 1H), 7.36 (d,  $J$  = 16.0 Hz, 1H), 7.58 (t,  $J$  = 7.5 Hz, 2H), 7.67 (t,  $J$  = 7.5 Hz, 1H), 7.74 (s, 1H), 8.00 (d,  $J$  = 7.5 Hz, 2H), 8.19 (s, 1H).

$^{13}\text{C}$ -NMR (125MHz, DMSO- $d_6$ ):  $\delta$  24.47, 48.79, 118.60, 125.57, 125.64, 127.59, 129.16, 130.70, 133.76, 134.85, 137.49, 147.10, 156.13, 162.56. MS (ESI)  $m/z$ : 368.0 ( $[\text{M}+\text{Na}]^+$ ). HRMS (ESI) for  $\text{C}_{16}\text{H}_{15}\text{N}_3\text{O}_4\text{S}$  ( $[\text{M}-\text{H}]^-$ ): calcd, 344.0705; found, 344.0686.

**(*E*)-*N*-Hydroxy-3-(1-(3-methoxyphenylsulfonyl)-2,3-dihydro-1H-pyrrolo[2,3-*b*]py**

**ridin-5-yl)acrylamide (9).** The title compound was obtained in 40.80% overall yield

from compound **25c** in a similar manner as described for the preparation of **6** with m.p. 219.1-220.4 °C. <sup>1</sup>H-NMR (500 MHz, DMSO-*d*<sub>6</sub>): δ 3.07 (t, *J* = 8.5 Hz, 2H), 3.79 (s, 3H), 4.03 (t, *J* = 8.5 Hz, 2H), 6.35 (d, *J* = 16.0 Hz, 1H), 7.22-7.24 (m, 1H), 7.37 (d, *J* = 16.0 Hz, 1H), 7.47-7.56 (m, 3H), 7.74 (s, 1H), 8.23 (s, 1H). <sup>13</sup>C-NMR (125MHz, DMSO-*d*<sub>6</sub>): δ 24.47, 48.82, 55.61, 112.51, 118.67, 119.57, 119.75, 125.66, 125.78, 130.38, 130.76, 134.84, 138.45, 147.11, 156.12, 159.22, 162.55. MS (ESI) *m/z*: 398.0 ([M+Na]<sup>+</sup>). HRMS (ESI) for C<sub>17</sub>H<sub>16</sub>N<sub>3</sub>O<sub>5</sub>S ([M-H]<sup>-</sup>): calcd, 374.0816; found, 374.0825.

**(*E*)-N-Hydroxy-3-(1-(3-nitrophenylsulfonyl)-2,3-dihydro-1H-pyrrolo[2,3-*b*]pyridin-5-yl)acrylamide (10).** The title compound was obtained in 71.16% overall yield from compound **25d** in a similar manner as described for the preparation of **6** with m.p. 158.8-160.3 °C. <sup>1</sup>H-NMR (500 MHz, CD<sub>3</sub>OD+ DMSO-*d*<sub>6</sub>): δ 3.14 (t, *J* = 8.5 Hz, 2H), 4.17 (t, *J* = 8.5 Hz, 2H), 6.39 (d, *J* = 16.0 Hz, 1H), 7.47 (d, *J* = 15.5 Hz, 1H), 7.75 (s, 1H), 7.84 (t, *J* = 8.0 Hz, 1H), 8.20 (s, 1H), 8.46 (d, *J* = 8.0 Hz, 1H), 8.48-8.50 (m, 1H), 8.90 (t, *J* = 9.0 Hz, 1H). <sup>13</sup>C-NMR (125MHz, DMSO-*d*<sub>6</sub>): δ 24.56, 48.94, 118.92, 122.69, 125.74, 126.07, 128.35, 131.06, 131.21, 133.56, 134.72, 138.79, 146.92, 147.71, 155.64, 162.48. MS (ESI) *m/z*: 413.0 ([M+Na]<sup>+</sup>). HRMS (ESI) for C<sub>16</sub>H<sub>13</sub>N<sub>4</sub>O<sub>6</sub>S ([M-H]<sup>-</sup>): calcd, 389.0561; found, 389.0543.

**(E)-N-Hydroxy-4-(4-(5-((E)-3-(hydroxyamino)-3-oxoprop-1-enyl)-2,3-dihydro-1H-pyrrolo[2,3-b]pyridin-1-ylsulfonyl)phenyl)but-2-enamide (11).** The title compound was obtained in 15.49% overall yield from compound **25e** in a similar manner as described for the preparation of **6** with m.p. 194.9-196.0 °C (decomp.). <sup>1</sup>H-NMR (500 MHz, DMSO-d<sub>6</sub>): δ 3.07 (t, *J* = 8.5 Hz, 2H), 4.07 (t, *J* = 8.5 Hz, 2H), 6.34 (d, *J* = 16.0 Hz, 1H), 6.54 (d, *J* = 16.0 Hz, 1H), 7.36 (d, *J* = 16.0 Hz, 1H), 7.45 (d, *J* = 16.0 Hz, 1H), 7.72-7.84 (m, 3H), 8.00 (d, *J* = 8.5 Hz, 2H), 8.18 (s, 1H), 10.70 (s, 1H), 10.83 (s, 1H). <sup>13</sup>C-NMR (125MHz, DMSO-d<sub>6</sub>): δ 24.50, 48.82, 118.65, 122.64, 125.63, 125.72, 127.94, 128.26, 130.74, 134.84, 136.38, 137.52, 139.92, 147.11, 156.05, 161.95, 162.55. MS (ESI) *m/z*: 453.0 ([M+Na]<sup>+</sup>). HRMS (ESI) for C<sub>19</sub>H<sub>17</sub>N<sub>4</sub>O<sub>6</sub>S ([M-H]): calcd, 429.0874; found, 429.0882.

**(E)-N-Hydroxy-3-(3-(5-((E)-3-(hydroxyamino)-3-oxoprop-1-enyl)-2,3-dihydro-1H-pyrrolo[2,3-b]pyridin-1-ylsulfonyl)phenyl)acrylamide (12).** The title compound was obtained in 37.17% overall yield from compound **25f** in a similar manner as described for the preparation of **6** with m.p. 219.6-220.7 °C. <sup>1</sup>H-NMR (500 MHz, DMSO-d<sub>6</sub>): δ 3.09 (t, *J* = 8.5 Hz, 2H), 4.10 (t, *J* = 8.5 Hz, 2H), 6.35 (d, *J* = 16.0 Hz, 1H), 6.56 (d, *J* = 16.0 Hz, 1H), 7.36 (d, *J* = 16.0 Hz, 1H), 7.50 (d, *J* = 16.0 Hz, 1H), 7.61 (t, *J* = 8.5 Hz, 1H), 7.75 (s, 1H), 7.84 (d, *J* = 8.0 Hz, 1H), 7.97 (d, *J* = 8.0 Hz, 1H), 8.22 (d, *J* = 10.0 Hz, 2H), 10.71 (s, 1H), 10.84 (s, 1H). <sup>13</sup>C-NMR (125MHz,

DMSO- $d_6$ ):  $\delta$  24.51, 48.86, 118.69, 121.42, 125.67, 125.76, 125.81, 128.01, 129.89, 130.74, 132.86, 134.82, 135.83, 136.52, 138.13, 147.10, 156.04, 162.03, 162.55. MS (ESI)  $m/z$ : 453.0 ( $[M+Na]^+$ ). HRMS (ESI) for  $C_{19}H_{17}N_4O_6S$  ( $[M-H]^-$ ): calcd, 429.0874; found, 429.0891.

**(*E*)-*N*-Hydroxy-3-(2-(5-(*E*)-3-(hydroxyamino)-3-oxoprop-1-enyl)-2,3-dihydro-1H-pyrrolo[2,3-b]pyridin-1-ylsulfonyl)phenyl)acrylamide (13).** The title compound was obtained in 33.19% overall yield from compound **25g** in a similar manner as described for the preparation of **6** with m.p. 220.2-221.4 °C.  $^1H$ -NMR (500 MHz, DMSO- $d_6$ ):  $\delta$  3.10 (t,  $J$  = 8.5 Hz, 2H), 4.28 (t,  $J$  = 8.5 Hz, 2H), 6.26-6.33 (m, 2H), 7.31 (d,  $J$  = 16.0 Hz, 1H), 7.60-7.71 (m, 3H), 7.74 (s, 1H), 7.96 (s, 1H), 8.14-8.17 (m, 2H), 8.99 (br, 1H), 9.17 (br, 1H), 10.69 (s, 1H), 10.83 (s, 1H).  $^{13}C$ -NMR (125MHz, DMSO- $d_6$ ):  $\delta$  24.37, 47.89, 118.40, 123.64, 125.12, 125.39, 128.04, 129.10, 130.45, 130.72, 133.86, 134.08, 134.30, 134.79, 137.08, 146.94, 155.65, 161.69, 162.49. MS (ESI)  $m/z$ : 453.0 ( $[M+Na]^+$ ). HRMS (ESI) for  $C_{19}H_{17}N_4O_6S$  ( $[M-H]^-$ ): calcd, 429.0874; found, 429.0882.

**5-Bromo-1-(4-methoxyphenylsulfonyl)-1H-pyrrolo[2,3-b]pyridine (27a).** A mixture of 5-bromo-7-azaindole (**26**, 0.35 g, 1.78mmol) was dissolved in DMF (2mL) and added the 60% NaH (0.06 g, 2.67mmol) and stirred for a while. Then added the 4-methoxybenzenesulfonyl chloride (0.55 g, 2.67mmol) and stirred for overnight at

room temperature. The reaction was added H<sub>2</sub>O to produce the precipitant. The residue was without more purification to afford **27a** (0.57 g, 87.20%) as a white solid. <sup>1</sup>H-NMR (500MHz, CDCl<sub>3</sub>): δ 3.83 (s, 3H), 6.52 (d, *J* = 4.0 Hz, 1H), 6.93 (t, *J* = 9.0 Hz, 2H), 7.73 (t, *J* = 4.0 Hz, 1H), 7.96 (d, *J* = 2.0 Hz, 1H), 8.11 (d, *J* = 9.0Hz, 2H), 8.44 (d, *J* = 2.5 Hz, 1H).

**5-Bromo-1-(4-fluorophenylsulfonyl)-1H-pyrrolo[2,3-b]pyridine (27b).** The title compound was obtained in 93.32% overall yield from compound **26** in a similar manner as described for the preparation of **27a**. <sup>1</sup>H-NMR (500MHz, CDCl<sub>3</sub>): δ 6.55 (d, *J* = 4.0 Hz, 1H), 7.17 (t, *J* = 9.0 Hz, 2H), 7.72 (t, *J* = 4.0 Hz, 1H), 7.99 (d, *J* = 2.5 Hz, 1H), 8.21-8.23 (m, 2H), 8.44 (d, *J* = 2.0 Hz, 1H).

**5-bromo-1-(4-bromophenylsulfonyl)-1H-pyrrolo[2,3-b]pyridine (27c).** The title compound was obtained in 81.20% overall yield from compound **26** in a similar manner as described for the preparation of **27a**. <sup>1</sup>H-NMR (500MHz, CDCl<sub>3</sub>): δ 6.56 (d, *J* = 4.0 Hz, 1H), 7.64 (t, *J* = 9.0 Hz, 2H), 7.71 (t, *J* = 4.0 Hz, 1H), 7.99 (s, 1H), 8.04 (d, *J* = 9.0 Hz, 2H), 8.44 (d, *J* = 2.0 Hz, 1H).

**5-Bromo-1-(3-bromophenylsulfonyl)-1H-pyrrolo[2,3-b]pyridine (27d).** The title compound was obtained in 85.26% overall yield from compound **26** in a similar manner as described for the preparation of **27a**. <sup>1</sup>H-NMR (500MHz, CDCl<sub>3</sub>): δ 6.57

(d,  $J = 3.5$  Hz, 1H), 7.38 (t,  $J = 8.0$  Hz, 1H), 7.71 (d,  $J = 4.5$  Hz, 2H), 7.99 (d,  $J = 2.0$  Hz, 1H), 8.13 (d,  $J = 8.0$  Hz, 1H), 8.33 (s, 1H), 8.46 (d,  $J = 2.0$  Hz, 1H).

**5-Bromo-1-(2-bromophenylsulfonyl)-1H-pyrrolo[2,3-b]pyridine (27e).** The title compound was obtained in 89.32% overall yield from compound **26** in a similar manner as described for the preparation of **27a**.  $^1\text{H-NMR}$  (500MHz,  $\text{CDCl}_3$ ):  $\delta$  6.57 (d,  $J = 4.0$  Hz, 1H), 7.44 (t,  $J = 8.0$  Hz, 1H), 7.57 (t,  $J = 8.0$  Hz, 1H), 7.63 (d,  $J = 8.0$ , 1H), 7.96 (d,  $J = 4.0$  Hz, 1H), 7.99 (d,  $J = 2.0$  Hz, 1H), 8.25 (d,  $J = 1.5$  Hz, 1H), 8.61 (d,  $J = 8.0$  Hz, 1H).

**(E)-3-(1-(4-Methoxyphenylsulfonyl)-1H-pyrrolo[2,3-b]20xpressi-5-yl)acrylic acid (28a).** The title compound was obtained in 88.17% overall yield from compound **27a** in a similar manner as described for the preparation of **21**.  $^1\text{H-NMR}$  (500MHz,  $\text{CD}_3\text{OD}$ ):  $\delta$  3.82 (s, 3H), 6.57 (d,  $J = 16.0$  Hz, 1H), 6.73 (d,  $J = 4.0$  Hz, 1H), 7.03 (t,  $J = 9.0$  Hz, 2H), 7.76 (d,  $J = 16.0$  Hz, 1H), 7.83 (t,  $J = 4.0$  Hz, 1H), 8.08 (d,  $J = 9.0$ Hz, 2H), 8.24 (d,  $J = 2.0$  Hz, 1H), 8.52 (d,  $J = 2$  Hz, 1H).

**(E)-3-(1-(4-Fluorophenylsulfonyl)-1H-pyrrolo[2,3-b] 20 xpressi-5-yl)acrylic acid (28b).** The title compound was obtained in 63.12% overall yield from compound **27b** in a similar manner as described for the preparation of **21**.  $^1\text{H-NMR}$  (500MHz,  $\text{CD}_3\text{OD}$ ):  $\delta$  6.58 (d,  $J = 16.0$  Hz, 1H), 6.77 (d,  $J = 3.5$  Hz, 1H), 7.29 (t,  $J = 8.5$  Hz,

2H), 7.76 (d,  $J = 16.0$  Hz, 1H), 7.85 (t,  $J = 4.0$  Hz, 1H), 8.22-8.25 (m, 2H), 8.26 (s, 1H), 8.53 (d,  $J = 2.0$  Hz, 1H).

**(*E*)-3-(4-(5-((*E*)-2-Carboxyvinyl)-1H-pyrrolo[2,3-*b*]21 xpressi-1-ylsulfonyl)phenyl**

**) acrylic acid (28c).** The title compound was obtained in 88.31% overall yield from compound **27c** in a similar manner as described for the preparation of **21**.  $^1\text{H-NMR}$  (500MHz, DMSO- $\text{d}_6$ ):  $\delta$  6.63 (d,  $J = 16.0$  Hz, 1H), 6.65 (d,  $J = 16.0$  Hz, 1H), 6.85 (d,  $J = 4.0$  Hz, 1H), 7.57 (d,  $J = 15.5$  Hz, 1H), 7.68 (d,  $J = 16.0$  Hz, 1H), 7.91 (d,  $J = 8.5$  Hz, 2H), 7.96 (d,  $J = 4.0$  Hz, 1H), 8.10 (d,  $J = 8.5$  Hz, 2H), 8.41 (d,  $J = 2.0$  Hz, 1H), 8.67 (d,  $J = 1.5$  Hz, 1H).

**(*E*)-3-(3-(5-((*E*)-2-Carboxyvinyl)-1H-pyrrolo[2,3-*b*]21 xpressi-1-ylsulfonyl)phenyl**

**) acrylic acid (28d).** The title compound was obtained in 87.57% overall yield from compound **27d** in a similar manner as described for the preparation of **21**.  $^1\text{H-NMR}$  (500MHz,  $\text{CD}_3\text{OD} + \text{DMSO-}\text{d}_6$ ):  $\delta$  6.62 (d,  $J = 16.0$  Hz, 2H), 6.83 (d,  $J = 4.0$  Hz, 1H), 7.63 (d,  $J = 8.0$  Hz, 1H), 7.69 (d,  $J = 16.0$  Hz, 1H), 7.77 (d,  $J = 16.0$  Hz, 1H), 7.94 (d,  $J = 4.0$  Hz, 2H), 8.18 (d,  $J = 8.0$  Hz, 1H), 8.31 (d,  $J = 2.0$  Hz, 1H), 8.42 (s, 1H), 8.60 (d,  $J = 2.0$  Hz, 1H).

**(*E*)-3-(2-(5-((*E*)-2-Carboxyvinyl)-1H-pyrrolo[2,3-*b*]21 xpressi-1-ylsulfonyl)phenyl**

**) acrylic acid (28e).** The title compound was obtained in 81.24% overall yield from compound **27e** in a similar manner as described for the preparation of **21**.  $^1\text{H-NMR}$

(500MHz, CD<sub>3</sub>OD+DMSO-d<sub>6</sub>):  $\delta$  6.15 (d,  $J$  = 16.0 Hz, 1H), 6.55 (d,  $J$  = 16.0 Hz, 1H), 6.76 (d,  $J$  = 4.0 Hz, 1H), 7.66-7.74 (m, 4H), 7.91 (d,  $J$  = 4.0 Hz, 1H), 8.26 (s, 1H), 8.39-8.42 (m, 2H), 8.45 (d,  $J$  = 16.0 Hz, 1H).

**(E)-N-Hydroxy-3-(1-(4-methoxyphenylsulfonyl)-1H-pyrrolo[2,3-b]pyridin-5-yl)**

**acrylamide (14).** The title compound was obtained in 90.91% overall yield from compound **28a** in a similar manner as described for the preparation of **6** with m.p.

192.5-193.3. <sup>1</sup>H-NMR (500MHz, DMSO-d<sub>6</sub>):  $\delta$  3.78 (s, 3H), 6.52 (d,  $J$  = 16.0 Hz, 1H), 6.81 (d,  $J$  = 4.0 Hz, 1H), 7.10 (t,  $J$  = 9.0 Hz, 2H), 7.54 (d,  $J$  = 16.0 Hz, 1H), 7.89 (t,  $J$  = 4.0 Hz, 1H), 8.03 (d,  $J$  = 9.0Hz, 2H), 8.23 (d,  $J$  = 1.5 Hz, 1H), 8.55 (d,  $J$  = 1.5 Hz, 1H). <sup>13</sup>C-NMR (125MHz, DMSO-d<sub>6</sub>):  $\delta$  55.85, 105.88, 114.77, 119.78, 122.57, 126.54, 127.82, 127.91, 128.64, 130.01, 135.45, 144.75, 146.67, 162.44, 163.93.

HRMS (ESI) for C<sub>17</sub>H<sub>16</sub>N<sub>3</sub>O<sub>5</sub>S ([M+H]<sup>+</sup>): calcd, 374.0811; found, 374.0822.

**(E)-3-(1-(4-Fluorophenylsulfonyl)-1H-pyrrolo[2,3-b]pyridin-5-yl)-N-hydroxy-**

**acrylamide (15).** The title compound was obtained in 86.69% overall yield from compound **28b** in a similar manner as described for the preparation of **6** with m.p.

213.6-214.5. <sup>1</sup>H-NMR (500MHz, DMSO-d<sub>6</sub>):  $\delta$  6.52 (d,  $J$  = 15.5 Hz, 1H), 6.86 (d,  $J$  = 4.0 Hz, 1H), 7.47 (t,  $J$  = 9.0 Hz, 2H), 7.55 (d,  $J$  = 15.5 Hz, 1H), 7.93(d,  $J$  = 4.0 Hz, 1H), 8.18-8.21 (m, 2H), 8.25 (s, 1H), 8.56 (s, 1H). <sup>13</sup>C-NMR (125MHz, DMSO-d<sub>6</sub>):  $\delta$  106.42, 116.92, 117.11, 119.98, 122.68, 126.82, 127.88, 128.03, 130.91, 130.99,

133.63, 135.37, 144.88, 146.70, 162.41, 164.44, 166.46. HRMS (ESI) for  $C_{16}H_{13}FN_3O_4S$  ( $[M+H]^+$ ): calcd, 362.0611; found, 362.0618.

**(*E*)-N-Hydroxy-3-(4-(5-((*E*)-3-(hydroxyamino)-3-oxoprop-1-enyl)-1H-pyrrolo[2,3-b]pyridin-1-ylsulfonyl)phenyl)acrylamide (16).** The title compound was obtained in 38.90% overall yield from compound **28c** in a similar manner as described for the preparation of **6** with m.p. 188.7-190.5 (decomp.).  $^1H$ -NMR (500MHz, DMSO- $d_6$ ):  $\delta$  6.54 (t,  $J = 16.0$  Hz, 2H), 6.86 (d,  $J = 4.0$  Hz, 1H), 7.44 (d,  $J = 15.5$  Hz, 1H), 7.54 (d,  $J = 15.5$  Hz, 1H), 7.77 (d,  $J = 8.5$  Hz, 2H), 7.93 (d,  $J = 4.0$  Hz, 1H), 8.10 (d,  $J = 8.5$  Hz, 2H), 8.25(s, 1H), 8.56(s, 1H).  $^{13}C$ -NMR (125MHz, DMSO- $d_6$ ):  $\delta$  106.43, 119.96, 122.67, 123.36, 126.80, 127.94, 128.15, 128.35, 135.34, 136.06, 137.17, 140.95, 144.91, 146.76, 162.38. HRMS (ESI) for  $C_{19}H_{17}N_4O_6S$  ( $[M+H]^+$ ): calcd, 429.0869; found, 429.0876.

**(*E*)-N-Hydroxy-3-(3-(5-((*E*)-3-(hydroxyamino)-3-oxoprop-1-enyl)-1H-pyrrolo[2,3-b]pyridin-1-ylsulfonyl)phenyl)acrylamide (17).** The title compound was obtained in 67.43% overall yield from compound **28d** in a similar manner as described for the preparation of **6** with m.p. 219.4-221.3 (decomp.).  $^1H$ -NMR (500MHz, DMSO- $d_6$ ):  $\delta$  6.52 (t,  $J = 15.5$  Hz, 1H), 6.59 (d,  $J = 16.0$  Hz, 1H), 6.87 (d,  $J = 4.0$  Hz, 1H), 7.50 (d,  $J = 16.0$  Hz, 1H), 7.55 (d,  $J = 15.5$  Hz, 1H), 7.64 (t,  $J = 8.5$  Hz, 1H), 7.89 (d,  $J = 8.0$  Hz, 1H), 7.94 (d,  $J = 4.0$  Hz, 1H), 8.05 (d,  $J = 8.0$  Hz, 1H), 8.25(s, 1H), 8.34 (s, 1H),

8.59(s, 1H).  $^{13}\text{C}$ -NMR (125MHz, DMSO- $\text{d}_6$ ):  $\delta$  106.44, 119.99, 121.98, 122.68, 125.67, 126.84, 127.76, 127.92, 128.03, 130.39, 133.74, 135.34, 136.10, 136.30, 138.08, 144.89, 146.72, 161.93, 162.39. HRMS (ESI) for  $\text{C}_{19}\text{H}_{17}\text{N}_4\text{O}_6\text{S}$  ( $[\text{M}+\text{H}]^+$ ): calcd, 429.0869; found, 429.0884.

**(*E*)-N-Hydroxy-3-(2-(5-((*E*)-3-(hydroxyamino)-3-oxoprop-1-enyl)-1H-pyrrolo[2,3-b]pyridin-1-ylsulfonyl)phenyl)acrylamide (18).** The title compound was obtained in 67.20% overall yield from compound **28e** in a similar manner as described for the preparation of **6** with m.p. 159.6-161.9 (decomp.).  $^1\text{H}$ -NMR (500MHz, DMSO- $\text{d}_6$ ):  $\delta$  6.19 (d,  $J$  = 15.5 Hz, 1H), 6.49 (d,  $J$  = 5.5 Hz, 1H), 6.84 (d,  $J$  = 4.0 Hz, 1H), 7.51 (d,  $J$  = 16.0 Hz, 1H), 7.65-7.70 (m, 2H), 7.76 (t,  $J$  = 7.0 Hz, 1H), 7.86 (d,  $J$  = 4.0 Hz, 1H), 8.10 (d,  $J$  = 15.5 Hz, 1H), 8.24 (s, 1H), 8.27 (d,  $J$  = 8.0 Hz, 1H), 8.41 (s, 1H).  $^{13}\text{C}$ -NMR (125MHz, DMSO- $\text{d}_6$ ):  $\delta$  105.63, 119.94, 122.46, 124.86, 126.80, 127.68, 127.94, 128.68, 129.48, 130.91, 133.08, 134.56, 135.25, 135.33, 144.84, 146.55, 161.34, 162.40. HRMS (ESI) for  $\text{C}_{19}\text{H}_{16}\text{NaN}_4\text{O}_6\text{S}$  ( $[\text{M}+\text{Na}]^+$ ): calcd, 451.0688; found, 451.0683.
